# Supplementary material for: Phenolic Biotransformations in Wheatgrass Juice after Primary and Secondary Fermentation
Source: MDPI journal article supplement (doi:10.3390/foods12081624), 2023-04-12
Supplement: s1 [file s1]

**Table S1.** Detection of secondary metabolites in fermented wheatgrass juice using LC-MS-MALDI-TOF/TOF and their characteristics

| RT   | Observed m/z value | Metabolite detected                                                             | Identity of compound                                                                                                                                         | Activities                                                                                                      | References (Compound identity) | References (Biological property) |
|------|--------------------|---------------------------------------------------------------------------------|--------------------------------------------------------------------------------------------------------------------------------------------------------------|-----------------------------------------------------------------------------------------------------------------|--------------------------------|----------------------------------|
| 1.4  | 122.9              | M+H                                                                             | 2,4- Dimethylphenol                                                                                                                                          | Anti-oxidant                                                                                                    | [1]                            | [2]                              |
| 30.6 | 149.0              | M+H                                                                             | Cinnamic acid                                                                                                                                                | Anti-cancer<br>Anti-diabetic<br>Anti-microbial<br>Cardioprotective<br>Hepatoprotective<br>Neuroprotective       | [3]                            | [4]                              |
| 1.3  | 170.9              | M-H                                                                             | Gallic acid                                                                                                                                                  | Anti-cancer<br>Anti-oxidant                                                                                     | [5]                            | [6]                              |
| 1.3  | 182.9              | M+NH <sub>4</sub>                                                               | Eugenol                                                                                                                                                      | Anti-inflammatory                                                                                               | [7]                            | [7]                              |
| 27.0 | 191.0              | M-H                                                                             | Quinic acid                                                                                                                                                  | Anti-diabetic<br>Anti-inflammatory<br>Anti-oxidant                                                              | [8]                            | [9]                              |
| 1.4  | 198.9              | Fragment M+3H                                                                   | 2-Methyl 4,6- dinitrophenol, Hydroxymethoxydimethyl benzoic acid                                                                                             | Anti-oxidant<br>Anti-inflammatory                                                                               | [1,10]                         | [11]                             |
| 30.6 | 245.0              | M-H<br><br>Fragment<br>Fragment<br>Fragment<br>Fragment<br>Fragment<br>Fragment | 3-or 4-Hydroxyphenyl propionic acid sulphate, Catechin, Catechin gallate, Epicatechin, Epicatechin gallate, Procyanidin B1, Procyanidin B2, Prodelphinidin A | Anti-cancer<br>Anti-diabetic<br>Anti-inflammatory<br>Anti-oxidant<br>Anti-tumorigenic                           | [12,13]                        | [14]                             |
| 19.0 | 246.2              | M-H                                                                             | Vanillic acid 4-sulfate                                                                                                                                      | Anti-inflammatory<br>Anti-oxidant<br>Neuroprotective                                                            | [15]                           | [16]                             |
| 1.4  | 257.1              | Fragment                                                                        | Ellagic acid                                                                                                                                                 | Anti-oxidant                                                                                                    | [17]                           | [18]                             |
| 33.3 | 271.2              | Fragment                                                                        | Pinobanksin arabinose                                                                                                                                        | Anti-bacterial<br>Anti-inflammatory<br>Anti-oxidant<br>Anti-parasitic<br>Anti-proliferative<br>Immunomodulatory | [19]                           | [20]                             |
| 33.3 | 272.2              | M+H                                                                             | Piperidine                                                                                                                                                   | Anti-cancerous<br>Anti-tumorigenic                                                                              | [21]                           | [21]                             |
| 21.8 | 274.2              | M+3H                                                                            | Pelarogonidin                                                                                                                                                | Anti-oxidant<br>Anti- cancerous                                                                                 | [22]                           | [22]                             |
| 21.8 | 275.2              | M-H                                                                             | Dihydroxyferulic acid sulphate                                                                                                                               | Anti-cancer<br>Anti-diabetic<br>Anti-inflammatory<br>Anti-microbial<br>Anti-oxidant                             | [12]                           | [23]                             |
| 1.6  | 277.0              | M+H                                                                             | Linoleic acid isomer 1 or 2                                                                                                                                  | Anti-atherogenic<br>Anti-cancer                                                                                 | [24]                           | [25]                             |
| 34.6 | 282.2              | M+2H                                                                            | Rhein                                                                                                                                                        | Anti-cancer<br>Anti-inflammatory<br>Anti-microbial<br>Anti-oxidant                                              | [26]                           | [27]                             |

|      |       |                                                     |                                                                                                                                                           |                                                                                                                                                                                              |            |        |
|------|-------|-----------------------------------------------------|-----------------------------------------------------------------------------------------------------------------------------------------------------------|----------------------------------------------------------------------------------------------------------------------------------------------------------------------------------------------|------------|--------|
| 1.4  | 288.9 | M+H                                                 | Fraxetin-7-O-sulfate                                                                                                                                      | Anti-bacterial<br>Anti-osteoporosis<br>Anti-oxidant                                                                                                                                          | [10]       | [28]   |
| 18.9 | 291.2 | M+H                                                 | Catechin                                                                                                                                                  | Anti-inflammatory<br>Growth inhibitory                                                                                                                                                       | [10]       | [14]   |
| 30.6 | 301.1 | Fragment<br>M-3H                                    | Delphinidin-3-glucoside,<br>Quercetin                                                                                                                     | Anti-bacterial<br>Anti-inflammatory<br>Anti-oxidant<br>Anti-viral<br>Gastroprotective<br>Immunomodulatory                                                                                    | [13]       | [29]   |
| 30.6 | 302.2 | M+H<br>Fragment<br>Fragment<br>Fragment<br>Fragment | Peonidin,<br>Peonidin-3-O-glucoside,<br>Peonidin-3-O-rutinoside-5-<br>glucoside,<br>Peonidin-3-O-sambioside-5-O-<br>glucoside,<br>Peonidin-3-O-rutinoside | Anti-bacterial<br>Anti-inflammatory<br>Anti-oxidant<br>Anti-viral<br>Gastroprotective<br>Immunomodulatory                                                                                    | [13,10]    | [29]   |
| 30.6 | 303.3 | Fragment<br>M-H<br>Fragment<br>Fragment             | Myricetin-3-O-glucoside,<br>Taxifolin,<br>Taxifolin-O-pentoside,<br>Taxifolin-3-O-rhamnoside                                                              | Anti-bacterial<br>Anti-inflammatory<br>Anti-oxidant<br>Anti-viral<br>Gastroprotective<br>Immunomodulatory                                                                                    | [13]       | [29]   |
| 26.4 | 315.1 | Fragment<br><br>M-H<br><br>Fragment<br>M-H          | Malvidin-3-(6-O-acetyl)<br>glucoside,<br>Protocatechuic acid 4-O-<br>glucoside,<br>Petunidin-3-O-glucoside,<br>Violanone                                  | Anti-ageing<br>Anti-asthmatic<br>Anti-athrogenic<br>Anti-bacterial<br>Anti-cancer<br>Anti-diabetic<br>Anti-inflammatory<br>Anti-oxidant<br>Anti-tumorigenic<br>Anti-ulcer<br>Neuroprotective | [13,30]    | [31]   |
| 27.0 | 319.0 | M+H<br>Fragment                                     | Myricetin,<br>Riboflavin                                                                                                                                  | Anti-cancer<br>Anti-oxidant<br>Anti-viral                                                                                                                                                    | [3]        | [22]   |
| 26.0 | 330.3 | Fragment                                            | Syringetin 3-O-hexoside                                                                                                                                   | Anti-bacterial<br>Anti-inflammatory<br>Anti-oxidant                                                                                                                                          | [32]       | [33]   |
| 26.0 | 331.3 | M+H<br>M+H<br>Fragment<br>Fragment<br>M-H<br>M-H    | Cirsiliol,<br>Tricin,<br>Malvidin-3-rutinoside,<br>Malvidin-acetyl-glucoside,<br>Carnosic acid,<br>Gallic acid 4-O-glucoside                              | Anti-inflammatory<br>Anti-neoplastic<br>Anti-oxidant<br>Cardioprotective<br>Neuroprotective                                                                                                  | [10,34,35] | [6,22] |
| 26.4 | 337.1 | M-H                                                 | 3-p-Coumaroylquinic acid                                                                                                                                  | Anti-inflammatory<br>Anti-microbial<br>Cardioprotective                                                                                                                                      | [36]       | [37]   |
| 35.1 | 338.3 | Fragment                                            | Ferulic acid                                                                                                                                              | Anti-cancer<br>Anti-diabetic<br>Anti-inflammatory<br>Anti-microbial<br>Anti-oxidant                                                                                                          | [38]       | [23]   |

|      |       |                               |                                                                                              |                                                                                                              |         |         |
|------|-------|-------------------------------|----------------------------------------------------------------------------------------------|--------------------------------------------------------------------------------------------------------------|---------|---------|
| 37.5 | 339.3 | M-H<br>M+H                    | 8-Prenylnaringenin,<br>Docosenoic acid                                                       | Anti-cancer<br>Anti-inflammatory<br>Anti-microbial<br>Anti-oxidant<br>Anti-viral                             | [10,39] | [40,41] |
| 27.0 | 341.0 | M-H<br>Fragment<br>M+H<br>M+H | 1-O-Caffeoyl glucose,<br>1-O-Sinapoyl- $\beta$ -D-glucose,<br>8-Prenylnaringenin,<br>Esculin | Anti-cancer<br>Anti-inflammatory<br>Anti-oxidant<br>Anti-viral                                               | [13,36] | [42]    |
| 32.4 | 343.1 | M+H                           | Malabaricone B                                                                               | Anti-inflammatory<br>Anti-microbial                                                                          | [7]     | [7]     |
| 23.9 | 346.3 | Fragment                      | Pallidol                                                                                     | Anti-microbial<br>Anti-oxidant                                                                               | [13]    | [43]    |
| 1.3  | 347.0 | M+H                           | Syringetin                                                                                   | Anti-oxidant                                                                                                 | [22]    | [44]    |
| 1.3  | 348.0 | M+NH <sub>4</sub>             | Dihydroguaiaretic acid                                                                       | Anti-oxidant                                                                                                 | [7]     | [7]     |
| 18.9 | 351.2 | M-H<br><br>M-H                | Trihydroxy-ent-kauranoic acid,<br>Naringenin sulfate                                         | Anti-bacterial<br>Anti-cancer<br>Anti-convulsant<br>Anti-inflammatory<br>Anti-leishmania<br>Anti-mutagenic   | [45,46] | [47,48] |
| 19.0 | 353.2 | M-H<br>M-H                    | 3-Caffeoylquinic acid,<br>Chlorogenic acid                                                   | Anti-bacterial<br>Anti-helminthic                                                                            | [15,49] | [50]    |
| 33.7 | 357.2 | M-H                           | Dihydrocaffeic acid 3-O-<br>glucuronide                                                      | Anti-oxidant                                                                                                 | [15]    | [51]    |
| 27.0 | 358.2 | Fragment                      | Avenasterol                                                                                  | Anti-diabetic<br>Anti-inflammatory<br>Cardioprotective                                                       | [10]    | [52]    |
| 27.0 | 360.2 | M+NH <sub>4</sub>             | Austrobailignan-7                                                                            | Anti-inflammatory<br>Anti-oxidant<br>Anti-tumorigenic                                                        | [7]     | [7]     |
| 1.6  | 365.1 | M+Na<br>Fragment              | Austrobailignan-7,<br>Phloretin-3',5-di-C- $\beta$ -glucoside                                | Anti-inflammatory<br>Anti-oxidant<br>Anti-tumorigenic<br>Anti-viral<br>Immunosuppressive<br>Cardioprotective | [7,53]  | [7]     |
| 25.4 | 375.3 | Fragment                      | Pentahydroxytrimethoxy<br>flavone                                                            | Anti-angiogenic<br>Anti-fungal<br>Anti-tumorigenic<br>Anti-viral<br>Immunomodulatory                         | [10]    | [54]    |
| 1.6  | 381.0 | M+H                           | Pentacosenoic acid                                                                           | Anti-microbial<br>Anti-thrombotic                                                                            | [10]    | [55]    |
| 1.3  | 391.1 | M+H                           | Monotropein                                                                                  | Anti-apoptotic<br>Anti-catabolic<br>Anti-fungal<br>Anti-inflammatory<br>Anti-nociceptive<br>Anti-oxidant     | [7]     | [7]     |
| 34.6 | 395.3 | M+Na<br><br>Fragment          | 1-(2,6-Dihydroxyphenyl)-<br>9-(4-hydroxy-3-methoxy<br>phenyl),<br>Catechin gallate           | Anti-angiogenic<br>Anti-melanogenic<br>Anti-oxidant<br>Anti-plasmodic                                        | [7,13]  | [56]    |
| 34.6 | 399.2 | M+H                           | Campestenone                                                                                 | Anti-cancerous<br>Anti-diabetic<br>Anti-inflammatory                                                         | [10]    | [57]    |

|      |       |                                         |                                                                                 |                                                                                                                                                                                               |         |         |
|------|-------|-----------------------------------------|---------------------------------------------------------------------------------|-----------------------------------------------------------------------------------------------------------------------------------------------------------------------------------------------|---------|---------|
| 35.1 | 406.3 | M+NH <sub>4</sub><br>Fragment           | Fragransin D1,<br>Pallidol                                                      | Anti-microbial<br>Anti-oxidant                                                                                                                                                                | [7,13]  | [43]    |
| 30.9 | 413.2 | M+H<br>M+H<br>Fragment                  | Avenasterol,<br>Fucosterol,<br>Apigenin-7-O-glucoside                           | Anti-diabetic<br>Anti-inflammatory<br>Cardioprotective                                                                                                                                        | [10,13] | [52]    |
| 28.5 | 414.2 | Fragment                                | Malvidin 3-O-glucoside-4-<br>vinylphenol                                        | Anti-ageing<br>Anti-asthmatic<br>Anti-atherogenic<br>Anti-bacterial<br>Anti-cancer<br>Anti-diabetic<br>Anti-inflammatory<br>Anti-oxidant<br>Anti-tumorigenic<br>Anti-ulcer<br>Neuroprotective | [32]    | [31]    |
| 24.4 | 415.2 | M-H                                     | Deoxyschisandrin                                                                | Anti-cancerous<br>Anti-inflammatory                                                                                                                                                           | [30]    | [58]    |
| 33.7 | 427.2 | M+H<br>Fragment                         | $\beta$ -Amyrin,<br>trans-Scirpusin A                                           | Anti-microbial<br>Anti-obesity<br>Anti-parasitic<br>Anti-tumorigenic                                                                                                                          | [10,13] | [59,60] |
| 33.7 | 429.2 | Fragment                                | Pinocembrin-O-arabiosyl-<br>glucoside                                           | Anti-cancer<br>Anti-inflammatory<br>Anti-microbial<br>Anti-oxidant                                                                                                                            | [61]    | [62]    |
| 34.6 | 431.1 | M-H                                     | Apigenin 6-C-glucoside                                                          | Anti-inflammatory<br>Anti-mutagenic<br>Anti-oxidant<br>Anti-viral                                                                                                                             | [15]    | [52]    |
| 24.4 | 437.1 | M+H<br>Fragment<br>Fragment<br>Fragment | Phlorizin,<br>Ampelosin D,<br>$\alpha$ -Viniferin,<br>Procyanidin dimer gallate | Anti-inflammatory<br>Anti-microbial<br>Anti-oxidant                                                                                                                                           | [10,13] | [63]    |
| 38.8 | 449.7 | M-H<br>M+H                              | Myricetin 7-O-pentoside,<br>Luteolin-8-C-glucoside                              | Anti-cancer<br>Anti-inflammatory<br>Anti-osteoporosis<br>Anti-oxidant<br>Anti-thrombotic<br>Cardioprotective                                                                                  | [10,32] | [64]    |
| 38.8 | 453.1 | M-H<br>M+H                              | p-Coumaroyl-hexoside-<br>methylglutarate,<br>Vebonol                            | Anti-cancer<br>Anti-diabetic<br>Anti-inflammatory<br>Anti-oxidant                                                                                                                             | [10,65] | [66]    |
| 1.4  | 458.8 | M-H                                     | Neotigogenin acetate                                                            | Anti-cancer                                                                                                                                                                                   | [5]     | [67]    |
| 30.0 | 463.3 | Fragment<br>M-H                         | Peonidin-3-O-rutinoside,<br>Myricetin 3-O-rhamnoside                            | Anti-Alzheimer's<br>Anti-inflammatory<br>Anti-Parkinson's                                                                                                                                     | [10,30] | [68,69] |
| 24.4 | 467.1 | M+H                                     | Taxifolin-3-O-glucoside                                                         | Anti-oxidant                                                                                                                                                                                  | [10]    | [70]    |
| 33.7 | 521.3 | M-H                                     | Salviaflaside derivatives                                                       | Anti-inflammatory                                                                                                                                                                             | [46]    | [71]    |
| 1.6  | 527.1 | M+H<br>M-H                              | Gibberellin acid 8-hexose-<br>gibberellin,<br>Naringenin glucuronide sulfate    | Anti-oxidant                                                                                                                                                                                  | [10,45] | [72]    |
| 18.9 | 549.1 | M-H                                     | Quercetin-7-O-<br>malonylhexoside                                               | Anti-angiogenic<br>Anti-inflammatory<br>Anti-oxidant<br>Anti-tumorigenic                                                                                                                      | [65]    | [73]    |

|      |       |            |                                                      |                                                                                                           |         |      |
|------|-------|------------|------------------------------------------------------|-----------------------------------------------------------------------------------------------------------|---------|------|
| 30.0 | 551.3 | M+H        | Quercetin 3-O-(6'-malonyl-glucoside),<br>Betanin     | Anti-angiogenic<br>Anti-inflammatory<br>Anti-oxidant<br>Anti-tumorigenic                                  | [30]    | [73] |
| 33.7 | 569.5 | M+H        | Zeaxanthin                                           | Anti-oxidant<br>Anti-inflammatory                                                                         | [10]    | [74] |
| 34.6 | 573.4 | M-H        | Viniferal                                            | Neuroprotective                                                                                           | [13]    | [75] |
| 30.0 | 595.3 | M-H<br>M+H | Neoeriocitrin,<br>Chrysoeriol C-hexoside-C-pentoside | Anti-oxidant<br>Anti-inflammatory                                                                         | [10,30] | [61] |
| 1.4  | 598.8 | M-H        | Spermidine- N5,10-di-p-coumaric acid-N1-caffeic acid | Anti-fungal<br>Anti-oxidant                                                                               | [19]    | [76] |
| 30.9 | 614.3 | M-H        | Spermidine- N1,10-di-caffeic acid-N5-p-coumaric acid | Anti-fungal<br>Anti-oxidant                                                                               | [19]    | [76] |
| 30.0 | 639.4 | M-H        | Laricitrin-3-O-rutinoside                            | Anti-allergic<br>Anti-inflammatory<br>Anti-microbial<br>Anti-oxidant                                      | [8]     | [77] |
| 30.0 | 640.4 | M+H        | Malvidin 3-O-rutinoside                              | Anti-inflammatory<br>Anti-oxidant                                                                         | [10]    | [22] |
| 1.4  | 717.9 | M+2H       | Salvianolic acid B isomer 1 or 2                     | Anti-cancer<br>Anti-inflammatory<br>Anti-oxidant<br>Cardioprotective                                      | [24]    | [28] |
| 30.0 | 727.4 | Fragment   | Kaempferol-rha-xyl-gal                               | Anti-oxidant                                                                                              | [78]    | [79] |
| 1.4  | 758.7 | M+H        | Peonidin 3-O-sambioside-5-O-glucoside                | Anti-oxidant<br>Anti-tumorigenic<br>Cardioprotective                                                      | [30]    | [80] |
| 34.6 | 771.4 | M+H        | 6-C-hexosyl-chrysoeriol-O-rhamnoside-O-hexoside      | Anti-cancer<br>Anti-inflammatory<br>Anti-microbial<br>Anti-osteoporosis<br>Anti-insect<br>Neuroprotective | [10]    | [81] |
| 30.9 | 805.5 | Fragment   | Malvidin-3-glucoside-4-vinyl (epi) catechin          | Anti-inflammatory<br>Anti-oxidant                                                                         | [82]    | [22] |

RT- Retention time

## References:

1. Nakamura, S.; Takino, M.; Daishima, S. Trace Level Determination of Phenols as Pentafluorobenzyl Derivatives by Gas Chromatography - Negative-Ion Chemical Ionization Mass Spectrometry. *Analyst* **2001**, *126* (6), 835–839.
2. Chukicheva, I. Yu.; Krylova, M. V.; Buravlev, E. V.; Suponitskii, K. Yu.; Kutchin, A. V. Alkylation of 2,4-Dimethylphenol with (+)- $\alpha$ - and (-)- $\beta$ -Pinenes in the Presence of Aluminum Xylenolate. *Russian J. Struct. Chem.* **2014**, *50* (4), 589–595.
3. Pamplona, S.; Sá, P.; Lopes, D.; Costa, E.; Yamada, E.; Silva, C.E.; Arruda, M.; Souza, J.; Da Silva, M. *In Vitro* Cytoprotective Effects and Antioxidant Capacity of Phenolic Compounds from the Leaves of *Swietenia macrophylla*. *Molecules* **2015**, *20*, 18777-18788.

4. Rychlicka, M.; Rot, A.; Gliszczynska, A. Biological Properties, Health Benefits and Enzymatic Modifications of Dietary Methoxylated Derivatives of Cinnamic Acid. *Foods* **2021**, *10* (6), 1417.
5. Tlhapi, D.B.; Ramaite, I.D.I.; Anokwuru, C.P. Metabolomic Profiling and Antioxidant Activities of *Breonadia salicina* Using <sup>1</sup>H-NMR and UPLC-QTOF-MS Analysis. *Molecules* **2021**, *26*, 6707.
6. Kahkeshani, N.; Farzaei, F.; Fotouhi, M.; Alavi, S.S.; Bahramsoltani, R.; Naseri, R.; Momtaz, S.; Abbasabadi, Z.; Rahimi, R.; Farzaei, M.H.; Bishayee, A. Pharmacological effects of gallic acid in health and diseases: A mechanistic review. *Iranian J. Basic Med. Sci.* **2019**, *22*(3), 225.
7. Marulasiddaswamy, K.M.; Nuthan, B.R.; Channarayapatna Ramesh, S.; Bajpe, S.N.; Kumara, K.K.S.; Sekhar, S.K.K. HRLC-MS based Profiling of Phytochemicals from Methanol Extracts of Leaves and Bark of *Myristica dactyloides* Gaertn. from Western Ghats of Karnataka, India. *J. Appl. Biol. Biotechnol.* **2021**, *9*(05), 124-135.
8. Lyubchyk, S.; Shapovalova, O.; Lygina, O.; Oliveira, M. C.; Appazov, N.; Lyubchyk, A.; Charmier, A. J.; Lyubchik, S.; Pombeiro, A. J. L. Integrated Green Chemical Approach to the Medicinal Plant *Carpobrotus Edulis* Processing. *Sci. Rep.* **2019**, *9* (1), 1-12.
9. Mortelé, O.; Jörissen, J.; Spacova, I.; Lebeer, S.; van Nuijs, A. L. N.; Hermans, N. Demonstrating the Involvement of an Active Efflux Mechanism in the Intestinal Absorption of Chlorogenic Acid and Quinic Acid Using a Caco-2 Bidirectional Permeability Assay. *Food Funct.* **2021**, *12* (1), 417–425.
10. Razgonova, M.P.; Zakharenko, A.M.; Gordeeva, E.I.; Shoeva, O.Y.; Antonova, E.V.; Pikula, K.S.; Koval, L.A.; Khlestkina, E.K.; Golokhvast, K.S. Phytochemical Analysis of Phenolics, Sterols, and Terpenes in Colored Wheat Grains by Liquid Chromatography with Tandem Mass Spectrometry. *Molecules* **2021**, *26*, 5580.
11. Minatel, I. O.; Borges, C. V.; Ferreira, M. I.; Gomez, H. A. G.; Chen, C.-Y. O.; Lima, G. P. Phenolic Compounds: Functional Properties, Impact of Processing and Bioavailability. *Phenolic Comp. Biol. Act.* **2017**, *8*, 1-24.

12. Pekkinen, J.; Rosa, N. N.; Savolainen, O.-I.; Keski-Rahkonen, P.; Mykkänen, H.; Poutanen, K.; Micard, V.; Hanhineva, K. Disintegration of Wheat Aleurone Structure Has an Impact on the Bioavailability of Phenolic Compounds and Other Phytochemicals as Evidenced by Altered Urinary Metabolite Profile of Diet-Induced Obese Mice. *Nutr. Metab.* **2014**, *11* (1), 1.
13. Goufo, P.; Singh, R.K.; Cortez, I. A Reference List of Phenolic Compounds (Including Stilbenes) in Grapevine (*Vitis vinifera* L.) Roots, Woods, Canes, Stems, and Leaves. *Antioxidants* **2020**, *9*(5), 398.
14. Rauf, A.; Imran, M.; Abu-Izneid, T.; Iahtisham-Ul-Haq; Patel, S.; Pan, X.; Naz, S.; Sanches Silva, A.; Saeed, F.; Rasul Suleria, H. A. Proanthocyanidins: A Comprehensive Review. *Biomedicine & Pharmacotherapy* **2019**, *116*, 108999.
15. Hameed, A.; Liu, Z.; Wu, H.; Zhong, B.; Ciborowski, M.; Suleria, H.A.R. A Comparative and Comprehensive Characterization of Polyphenols of Selected Fruits from the Rosaceae Family. *Metabolites* **2022**, *12*, 271.
16. Ingole, A.; Kadam, M.; Dalu, A. P.; Kute, S. M.; Mange, P. R.; Theng, V. D.; Lahane, O. R.; Nikas, A. P.; Kawal, Y. V.; Nagrik, S. U.; Patil, P. A. A Review of the Pharmacological Characteristics of Vanillic Acid. *J. Drug Deliv. Ther.* **2021**, *11*, 200-204.
17. Wyrepkowski, C.C.; Gomes da Costa, D.L.M.; Sinhorin, A.P.; Vilegas, W.; De Grandis, R.A.; Resende, F.A.; Varanda, E.A.; Dos Santos, L.C. Characterization and Quantification of the Compounds of the Ethanolic Extract from *Caesalpinia ferrea* Stem Bark and Evaluation of Their Mutagenic Activity. *Molecules* **2014**, *19*, 16039-16057.
18. Kim, J.-P.; Lee, I.-K.; Yun, B.-S.; Chung, S.-H.; Shim, G.-S.; Koshino, H.; Yoo, I.-D. Ellagic Acid Rhamnosides from the Stem Bark of Eucalyptus Globulus. *Phytochemistry* **2001**, *57* (4), 587–591.
19. Gardana, C.; Del Bo', C.; Quicazán, M. C.; Correa, A. R.; Simonetti, P. Nutrients, Phytochemicals and Botanical Origin of Commercial Bee Pollen from Different Geographical Areas. *J. Food Compos. Anal.* **2018**, *73*, 29–38.
20. Alday, E.; Valencia, D.; Carreño, A. L.; Picerno, P.; Piccinelli, A. L.; Rastrelli, L.; Robles-Zepeda, R.; Hernandez, J.; Velazquez, C. Apoptotic Induction by Pinobanksin and Some of

- Its Ester Derivatives from Sonoran Propolis in a B-Cell Lymphoma Cell Line. *Chem.-Biol. Interact.* **2015**, *242*, 35–44.
21. Olalere, O. A.; Abdurahman, N. H.; Yunus, R. bin M.; Alara, O. R.; Kabbashi, N. A. Chemical Fingerprinting of Biologically Active Compounds and Morphological Transformation during Microwave Reflux Extraction of Black Pepper. *Chem. Data Collect.* **2018**, *17-18*, 339–344.
  22. Kaur, B.; Kumar, B.; Kaur, G.; Chakraborty, D.; Kaur, K. Application of Recombinant *Pediococcus Acidilactici* BD16 (Fcs + /Ech + ) in Malolactic Fermentation. *Appl. Microbiol. Biotechnol.* **2015**, *99* (7), 3015–3028.
  23. Zduńska, K.; Dana, A.; Kolodziejczak, A.; Rotsztein, H. Antioxidant Properties of Ferulic Acid and Its Possible Application. *Skin Pharmacol. Physiol.* **2018**, *31* (6), 332–336.
  24. Nastić, N.; Borrás-Linares, I.; Lozano-Sánchez, J.; Švarc-Gajić, J.; Segura-Carretero, A. Comparative Assessment of Phytochemical Profiles of Comfrey (*Symphytum officinale* L.) Root Extracts Obtained by Different Extraction Techniques. *Molecules* **2020**, *25*, 837.
  25. Aydin, R. 2005. Conjugated linoleic acid: chemical structure, sources and biological properties. *Turkish J. Vet. Animal Sci.* *29*(2), 189-195.
  26. Zolkeflee, N.K.Z.; Ramli, N.S.; Azlan, A.; Abas, F. In Vitro Anti-Diabetic Activities and UHPLC-ESI-MS/MS Profile of *Muntingia calabura* Leaves Extract. *Molecules* **2022**, *27*, 287.
  27. Zhou, Y.-X.; Xia, W.; Yue, W.; Peng, C.; Rahman, K.; Zhang, H. Rhein: A Review of Pharmacological Activities. *Evid.-Based Complementary Altern. Med.* **2015**, *2015*, 1–10.
  28. Qin, Z.; Zhang, B.; Yang, J.; Li, S.; Xu, J.; Yao, Z.; Zhang, X.; Gonzalez, F. J.; Yao, X. The Efflux Mechanism of Fraxetin-O-Glucuronides in UGT1A9-Transfected HeLa Cells: Identification of Multidrug Resistance-Associated Proteins 3 and 4 (MRP3/4) as the Important Contributors. *Frontiers in Pharmacology* **2019**, *10*, 496.
  29. Kim, J.K.; Park, S.U. Quercetin and its Role in Biological Functions: An Updated Review. *EXCLI J.* **2018**, *17*, 856.



30. Subbiah, V.; Zhong, B.; Nawaz, M.A.; Barrow, C.J.; Dunshea, F.R.; Suleria, H.A.R. Screening of Phenolic Compounds in Australian Grown Berries by LC-ESI-QTOF-MS/MS and Determination of Their Antioxidant Potential. *Antioxidants* **2021**, *10*, 26.
31. Khan, A.K.; Rashid, R.; Fatima, N.; Mahmood, S.; Mir, S.; Khan, S.; Jabeen, N.; Murtaza, G. Pharmacological Activities of Protocatechuic Acid. *Acta Pol. Pharm.* **2015**, *72*(4), 643-650.
32. Šuković, D.; Knežević, B.; Gašić, U.; Sredojević, M.; Ćirić, I.; Todić, S.; Mutić, J.; Tešić, Ž. Phenolic Profiles of Leaves, Grapes and Wine of Grapevine Variety Vranac (*Vitis vinifera* L.) from Montenegro. *Foods* **2020**, *9*, 138.
33. Patel, D. K. Biological Importance, Therapeutic Benefit, and Medicinal Importance of Flavonoid, Cirsiliol for the Development of Remedies against Human Disorders. *Curr. Bioact. Compd.* **2022**, *18*(3), 2-10.
34. Aguilar, T.; Loyola, C.; de Bruijn, J.; Bustamante, L.; Vergara, C.; von Baer, D.; Mardones, C.; Serra, I. Effect of Thermomaceration and Enzymatic Maceration on Phenolic Compounds of Grape Must Enriched by Grape Pomace, Vine Leaves and Canes. *Eur. Food Res. Technol.* **2015**, *242* (7), 1149–1158.
35. Du, J.; Zhong, B.; Subbiah, V.; Barrow, C.J.; Dunshea, F.R.; Suleria, H.A.R. LC-ESI-QTOF-MS/MS Profiling and Antioxidant Activity of Phenolics from Custard Apple Fruit and By-Products. *Separations* **2021**, *8*, 62.
36. Chen, Z.; Zhong, B.; Barrow, C. J.; Dunshea, F. R.; Suleria, H. A. R. Identification of Phenolic Compounds in Australian Grown Dragon Fruits by LC-ESI-QTOF-MS/MS and Determination of Their Antioxidant Potential. *Arab. J. Chem.* **2021**, *14* (6), 103151.
37. Sun, L.; Tao, S.; Zhang, S. Characterization and Quantification of Polyphenols and Triterpenoids in Thinned Young Fruits of Ten Pear Varieties by UPLC-Q TRAP-MS/MS. *Molecules* **2019**, *24*, 159.
38. Felhi, S.; Baccouch, N.; Ben Salah, H.; Smaoui, S.; Allouche, N.; Gharsallah, N.; Kadri, A. Nutritional Constituents, Phytochemical Profiles, in Vitro Antioxidant and Antimicrobial Properties, and Gas Chromatography–Mass Spectrometry Analysis of Various Solvent

- Extracts from Grape Seeds (*Vitis Vinifera* L.). *Food Sci. Biotechnol.* **2016**, *25* (6), 1537–1544.
39. Lu, Y.; Zhu, S.; He, Y.; Peng, C.; Wang, Z.; Tang, Q. Phytochemical Profile and Antidepressant Effect of *Ormosia henryi* Prain Leaf Ethanol Extract. *Int. J. Mol. Sci.* **2019**, *20*, 3396.
  40. Melo, I. S.; Santos, S. N.; Rosa, L. H.; Parma, M. M.; Silva, L. J.; Queiroz, S. C. N.; Pellizari, V. H. Isolation and Biological Activities of an Endophytic *Mortierella Alpina* Strain from the Antarctic Moss *Schistidium Antarcticum*. *Extremophiles* **2013**, *18* (1), 15–23.
  41. Mukai, R. Prenylation Enhances the Biological Activity of Dietary Flavonoids by Altering Their Bioavailability. *Biosci. Biotechnol. Biochem.* **2018**, *82* (2), 207–215.
  42. Azam, F.; Chaudhry, B. A.; Ijaz, H.; Qadir, M. I. Caffeoyl- $\beta$ -D-Glucopyranoside and 1,3-Dihydroxy-2-Tetracosanoylamino-4-(E)-Nonadecene Isolated from *Ranunculus Muricatus* Exhibit Antioxidant Activity. *Sci. Rep.* **2019**, *9* (1).
  43. Abourashed, E. A.; El-Alfy, A. T. Chemical Diversity and Pharmacological Significance of the Secondary Metabolites of Nutmeg (*Myristica Fragrans* Houtt.). *Phytochem. Rev.: Proceedings of the Phytochemical Society of Europe* **2016**, *15* (6), 1035–1056.
  44. Correa-Betanzo, J.; Allen-Vercoe, E.; McDonald, J.; Schroeter, K.; Corredig, M.; Paliyath, G. Stability and Biological Activity of Wild Blueberry (*Vaccinium Angustifolium*) Polyphenols during Simulated in Vitro Gastrointestinal Digestion. *Food Chem.* **2014**, *165*, 522–531.
  45. Untergehrer, M.; Kiermaier, J.; Reintjes, S.; Heilmann, J.; Jürgenliemk, G. Identification of Phase-II Metabolites from Human Serum Samples after Oral Intake of a Willow Bark Extract. *Phytomedicine* **2019**, *57*, 396–402.
  46. Ślusarczyk, S.; Cieślak, A.; Yanza, Y.R.; Szumacher-Strabel, M.; Varadyova, Z.; Stafiniak, M.; Wojnicz, D.; Matkowski, A. Phytochemical Profile and Antioxidant Activities of *Coleus amboinicus* Lour. Cultivated in Indonesia and Poland. *Molecules* **2021**, *26*, 2915.
  47. Moreira, M. R.; Souza, A. B.; Soares, S.; Bianchi, T. C.; de Souza Eugênio, D.; Lemes, D. C.; Martins, C. H. G.; da Silva Moraes, T.; Tavares, D. C.; Ferreira, N. H.; Ambrósio, S.

- R.; Veneziani, R. C. S. Ent-Kaurenoic Acid-Rich Extract from *Mikania Glomerata*: In Vitro Activity against Bacteria Responsible for Dental Caries. *Fitoterapia* **2016**, *112*, 211–216.
48. Thawabteh, A.; Juma, S.; Bader, M.; Karaman, D.; Scrano, L.; Bufo, S.A.; Karaman, R. The Biological Activity of Natural Alkaloids against Herbivores, Cancerous Cells and Pathogens. *Toxins* **2019**, *11*, 656.
49. Leyva-Jiménez, F.J.; Ruiz-Malagón, A.J.; Molina-Tijeras, J.A.; Diez-Echave, P.; Vezza, T.; Hidalgo-García, L.; Lozano-Sánchez, J.; Arráez-Román, D.; Cenis, J.L.; Lozano-Pérez, A.A.; Rodríguez-Nogales, A.; Segura-Carretero, A.; Gálvez, J. Comparative Study of the Antioxidant and Anti-Inflammatory Effects of Leaf Extracts from Four Different *Morus alba* Genotypes in High Fat Diet-Induced Obesity in Mice. *Antioxidants* **2020**, *9*, 733.
50. Scholz, E.; Heinrich, M.; Hunkler, D. Caffeoylquinic Acids and Some Biological Activities Of *Pluchea Symphytifolia*. *Planta Med.* **1994**, *60* (04), 360–364.
51. Piazzon, A.; Vrhovsek, U.; Masuero, D.; Mattivi, F.; Mandoj, F.; Nardini, M. Antioxidant Activity of Phenolic Acids and Their Metabolites: Synthesis and Antioxidant Properties of the Sulfate Derivatives of Ferulic and Caffeic Acids and of the Acyl Glucuronide of Ferulic Acid. *J. Agric. Food Chem.* **2012**, *60* (50), 12312–12323.
52. Salehi, B.; Venditti, A.; Sharifi-Rad, M.; Kręgiel, D.; Sharifi-Rad, J.; Durazzo, A.; Lucarini, M.; Santini, A.; Souto, E.B.; Novellino, E.; Antolak, H.; Azzini, E.; Setzer, W.N.; Martins, N. The Therapeutic Potential of Apigenin. *Int. J. Mol. Sci.* **2019**, *20*, 1305.
53. De Beer, D.; Schulze, A.E.; Joubert, E.; De Villiers, A.; Malherbe, C.J.; Stander, M.A. Food Ingredient Extracts of *Cyclopia subternata* (Honeybush): Variation in Phenolic Composition and Antioxidant Capacity. *Molecules* **2012**, *17*, 14602–14624.
54. Rashid, M. I.; Fareed, M. I.; Rashid, H.; Aziz, H.; Ehsan, N.; Khalid, S.; Ghaffar, I.; Ali, R.; Gul, A.; Hakeem, K. R. Flavonoids and Their Biological Secrets. *Plant and Human Health, Volume 2* **2019**, 579–605.
55. Karthikeyan, G.; Rajendran, L.; Sendhilvel, V.; Prabakar, K.; Raguchander, T. Diversity and Functions of Secondary Metabolites Secreted by Epi-Endophytic Microbes and Their

- Interaction with Phytopathogens. *Biocontrol Agents and Secondary Metabolites* **2021**, 495–517.
56. Fuloria, S.; Sekar, M.; Khattulanuar, F.S.; Gan, S.H.; Rani, N.N.I.M.; Ravi, S.; Subramanian, V.; Jeyabalan, S.; Begum, M.Y.; Chidambaram, K.; Sathasivam, K.V.; Safi, S.Z.; Wu, Y.S.; Nordin, R.; Maziz, M.N.H.; Kumarasamy, V.; Lum, P.T.; Fuloria, N.K. Chemistry, Biosynthesis and Pharmacology of Viniferin: Potential Resveratrol-Derived Molecules for New Drug Discovery, Development and Therapy. *Molecules* **2022**, 27, 5072.
  57. Miras-Moreno, B.; Sabater-Jara, A. B.; Pedreño, M. A.; Almagro, L. Bioactivity of Phytosterols and Their Production in Plant in Vitro Cultures. *J. Agric. Food Chem.* **2016**, 64 (38), 7049–7058.
  58. Ho, M.-L.; Chen, P.-N.; Chu, S.-C.; Kuo, D.-Y.; Kuo, W.-H.; Chen, J.-Y.; Hsieh, Y.-S. Peonidin 3-Glucoside Inhibits Lung Cancer Metastasis by Downregulation of Proteinases Activities and MAPK Pathway. *Nutr. Cancer* **2010**, 62 (4), 505–516.
  59. Fernandes, C. P.; Corrêa, A. L.; Lobo, J. F. R.; Caramel, O. P.; de Almeida, F. B.; Castro, E. S.; Souza, K. F. C. S.; Burth, P.; Amorim, L. M. F.; Santos, M. G.; Ferreira, J. L. P.; Falcão, D. Q.; Carvalho, J. C. T.; Rocha, L. Triterpene Esters and Biological Activities from Edible Fruits of *Manilkara Subsericea*(Mart.) Dubard, Sapotaceae. *BioMed Res. Int.* **2013**, 2013, 1–7.
  60. Zahr, A.; Alcaide, P.; Yang, J.; Jones, A.; Gregory, M.; dela Paz, N. G.; Patel-Hett, S.; Nevers, T.; Koirala, A.; Luscinskas, F. W.; Saint-Geniez, M.; Ksander, B.; D'Amore, P. A.; Argüeso, P. Endomucin Prevents Leukocyte–Endothelial Cell Adhesion and Has a Critical Role under Resting and Inflammatory Conditions. *Nature Commun.* **2016**, 7 (1).
  61. Denaro, M.; Smeriglio, A.; Trombetta, D. Antioxidant and Anti-Inflammatory Activity of *Citrus* Flavanones Mix and Its Stability after In Vitro Simulated Digestion. *Antioxidants* **2021**, 10, 140.
  62. Rasul, A.; Millimouno, F. M.; Ali Eltayb, W.; Ali, M.; Li, J.; Li, X. Pinocembrin: A Novel Natural Compound with Versatile Pharmacological and Biological Activities. *BioMed Res. Int.* **2013**, 2013, 1–9.

63. Baldisserotto, A.; Malisardi, G.; Scalambra, E.; Andreotti, E.; Romagnoli, C.; Vicentini, C.B.; Manfredini, S.; Vertuani, S. Synthesis, Antioxidant and Antimicrobial Activity of a New Phloridzin Derivative for Dermo-Cosmetic Applications. *Molecules* **2012**, *17*, 13275–13289.
64. Liang, Z.; Liang, H.; Guo, Y.; Yang, D. Cyanidin 3-*O*-galactoside: A Natural Compound with Multiple Health Benefits. *Int. J. Mol. Sci.* **2021**, *22*, 2261.
65. Guimarães, R.; Barros, L.; Dueñas, M.; Calhella, R. C.; Carvalho, A. M.; Santos-Buelga, C.; Queiroz, M. J. R. P.; Ferreira, I. C. F. R. Nutrients, Phytochemicals and Bioactivity of Wild Roman Chamomile: A Comparison between the Herb and Its Preparations. *Food Chem.* **2013**, *136* (2), 718–725.
66. Qamar, M.; Akhtar, S.; Ismail, T.; Wahid, M.; Barnard, R.T.; Esatbeyoglu, T.; Ziora, Z.M. The Chemical Composition and Health-Promoting Effects of the *Grewia* Species—A Systematic Review and Meta-Analysis. *Nutrients* **2021**, *13*, 4565.
67. Valadares, Y. M.; Brandão, G. C.; Kroon, E. G.; Souza Filho, J. D.; Oliveira, A. B.; Braga, F. C. Antiviral Activity of *Solanum paniculatum* Extract and Constituents. *Z. Naturforsch.* **2009**, *64* (11–12), 813–818.
68. Semwal, D.K.; Semwal, R.B.; Combrinck, S.; Viljoen, A. Myricetin: A Dietary Molecule with Diverse Biological Activities. *Nutrients* **2016**, *8*, 90.
69. Sari, D.R.T.; Cairns, J.R.K.; Safitri, A.; Fatchiyah, F. Virtual Prediction of the Delphinidin-3-*O*-Glucoside and Peonidin-3-*O*-Glucoside as Anti-Inflammatory of TNF- $\alpha$  Signaling. *Acta Inform. Med.* **2019**, *27*(3), 152.
70. Topal, F.; Nar, M.; Gocer, H.; Kalin, P.; Kocyigit, U. M.; Gülçin, İ.; Alwasel, S. H. Antioxidant Activity of Taxifolin: An Activity–Structure Relationship. *J. Enzyme Inhib. Med. Chem.* **2015**, *31* (4), 674–683.
71. Bao-Qing, W., *Salvia Miltiorrhiza*: Chemical and Pharmacological Review of a Medicinal Plant. *J. Med. Plants Res.* **2010**, *4*(25), 2813–2820.
72. Metzger, J. D. Comparison of Biological Activities of Gibberellins and Gibberellin-Precursors Native to *Thlaspi arvense* L. *Plant Physiol.* **1990**, *94* (1), 151–156.

73. Yang, D.; Wang, T.; Long, M.; Li, P. Quercetin: Its Main Pharmacological Activity and Potential Application in Clinical Medicine. *Oxid. Med. Cell. Longev.* **2020**, *2020*, 1–13.
74. Murillo, A.G.; Hu, S.; Fernandez, M.L. Zeaxanthin: Metabolism, Properties, and Antioxidant Protection of Eyes, Heart, Liver, and Skin. *Antioxidants* **2019**, *8*, 390.
75. Papastamoulis, Y.; Richard, T.; Nassra, M.; Badoc, A.; Krisa, S.; Harakat, D.; Monti, J.-P.; Mérillon, J.-M.; Waffo-Teguo, P. Viniphenol A, a Complex Resveratrol Hexamer From *Vitis Vinifera* Stalks: Structural Elucidation and Protective Effects against Amyloid- $\beta$ -Induced Toxicity in PC12 Cells. *J. Nat. Prod.* **2014**, *77* (2), 213–217.
76. Walters, D.; Meurer-Grimes, B.; Rovira, I. Antifungal Activity of Three Spermidine Conjugates. *FEMS Microbiol. Lett.* **2001**, *201* (2), 255–258.
77. Karapandzova, M.; Stefkov, G.; Cvetkovikj, I.; Stanoeva, J. P.; Stefova, M.; Kulevanova, S. Flavonoids and Other Phenolic Compounds in Needles of *Pinus Peuce* and Other Pine Species from the Macedonian Flora. *Nat. Prod. Commun.* **2015**, *10* (6), 1934578X1501000.
78. Carlsen, S. C. K.; Pedersen, H. A.; Spliid, N. H.; Fomsgaard, I. S. Fate in Soil of Flavonoids Released from White Clover (*Trifolium Repens* L.). *Appl. Environ. Soil Sci.* **2012**, *2012*, 1–10.
79. Hazrati, H.; Fomsgaard, I. S.; Kudsk, P. Targeted Metabolomics Unveil Alteration in Accumulation and Root Exudation of Flavonoids as a Response to Interspecific Competition. *J. Plant Interact.* **2021**, *16* (1), 53–63.
80. Zheng, J.; Ding, C.; Wang, L.; Li, G.; Shi, J.; Li, H.; Wang, H.; Suo, Y. Anthocyanins Composition and Antioxidant Activity of Wild *Lycium Ruthenicum* Murr. From Qinghai-Tibet Plateau. *Food Chem.* **2011**, *126* (3), 859–865.
81. Aboulaghras, S.; Sahib, N.; Bakrim, S.; Benali, T.; Charfi, S.; Guaouguaou, F.-E.; Omari, N.E.; Gallo, M.; Montesano, D.; Zengin, G.; Taghzouti, K.; Bouyahya, A. Health Benefits and Pharmacological Aspects of Chrysoeriol. *Pharmaceuticals* **2022**, *15*, 973.
82. Zhu, L.; Zhang, Y.; Deng, J.; Li, H.; Lu, J. Phenolic Concentrations and Antioxidant Properties of Wines Made from North American Grapes Grown in China. *Molecules* **2012**, *17*, 3304–3323.
